# Supplementary material for: Stress Markers, Executive Functioning, and Resilience Among Early Adolescents With Complex Congenital Heart Disease
Source: PubMed Central journal article supplement (PMC10858402; doi:10.1001/jamanetworkopen.2023.55373), 2024-02-09
Supplement: jamanetwopen-e2355373-s002.pdf [file jamanetwopen-e2355373-s002.pdf]

## Data Sharing Statement

von Werdt. Stress Markers, Executive Functioning, and Resilience Among Early Adolescents With Complex Congenital Heart Disease. *JAMA Netw Open*. Published February 09, 2024. doi:10.1001/jamanetworkopen.2023.55373

### Data

**Data available:** Yes

**Data types:** Deidentified participant data

**How to access data:** request sent to [melanie.ehrler@kispi.uzh.ch](mailto:melanie.ehrler@kispi.uzh.ch) (corresponding author)

**When available:** With publication

### Supporting Documents

**Document types:** None

### Additional Information

**Who can access the data:** for research purpose only, after ethical approval and signed data sharing agreement

**Types of analyses:** for research purpose only

**Mechanisms of data availability:** after approval of proposal, ethical approval and signed data sharing agreement

**Any additional restrictions:** research purpose only
